# Supplementary material
Source: publisher figshare collection journal article supplement (https://acs.figshare.com/ndownloader/files/5186404)

## Supporting Information

### XRD pattern of calcined AMS-3

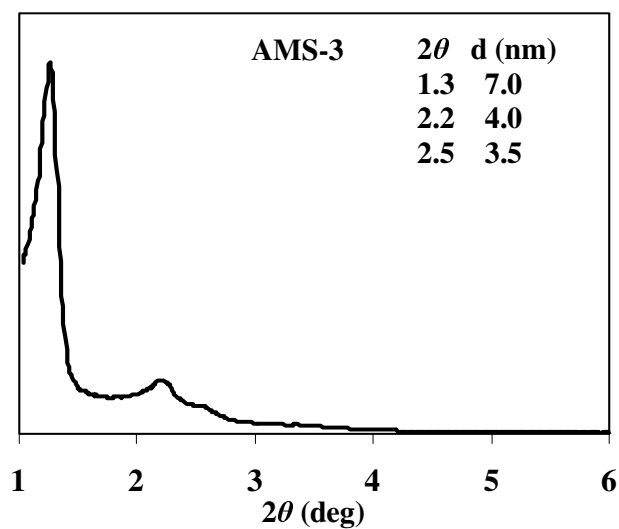

### FT Diffractogram tilt-series recorded for mesoporous material AMS-8 (observed and calculated tilt angles based on cubic F crystal class)

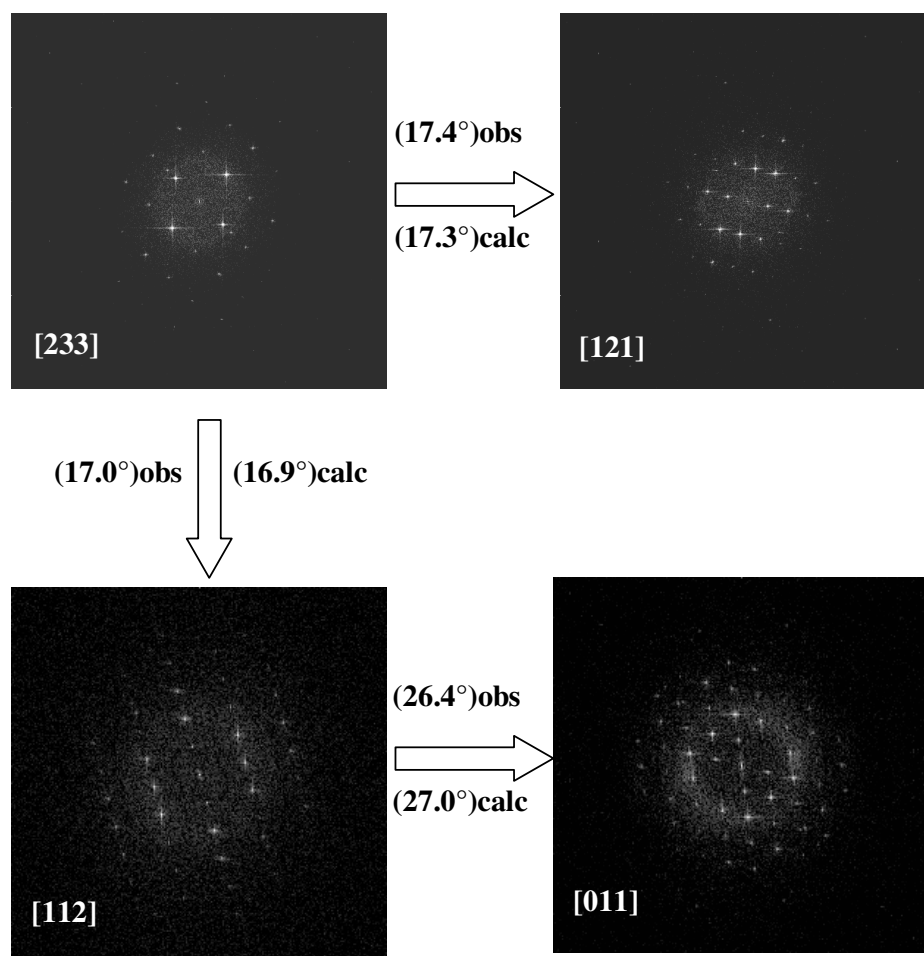

Supplement: Supplementary file 1 [file 5186404]
